# Supplementary material
Source: MDPI journal article supplement (https://www.mdpi.com/2227-9040/11/3/182)
Supplement: s1 [file s1]

## Supplementary materials

Supplementary Figure S1. Examples of spectrometer positioning during the analyses: (a) SCiO, (b) Viavi Micro-NIR, (c) AvaSpec with optical fibre, (d) AvaSpec with integrating sphere, (e) NeoSpectra Scanner, (f) NeoSpectra Development kit

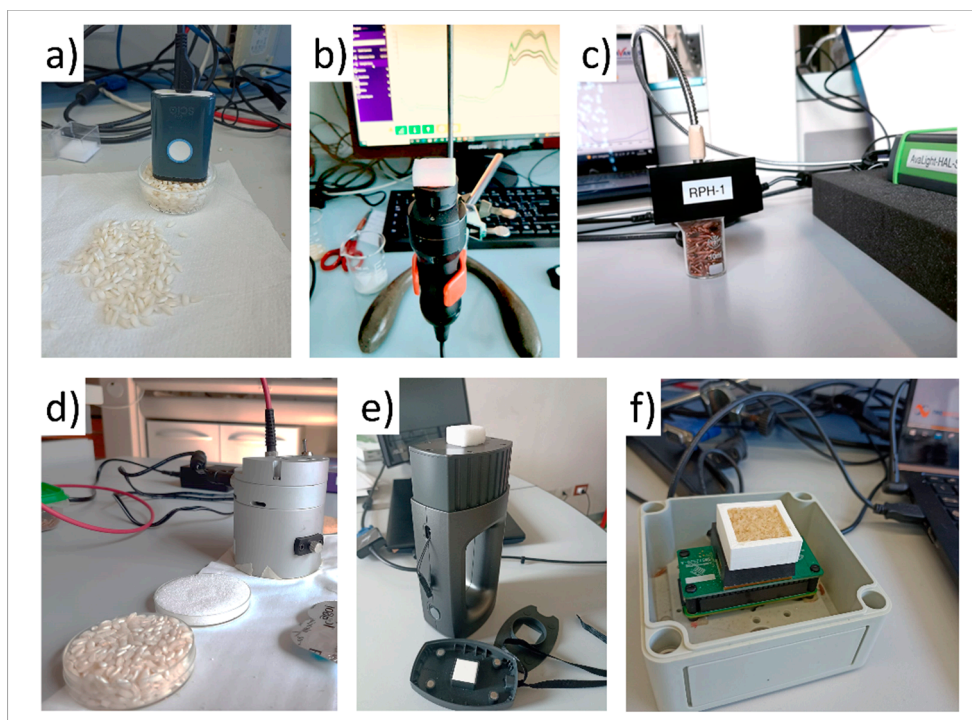

Supplementary Figure S2. Dataset structure scheme for SCiO

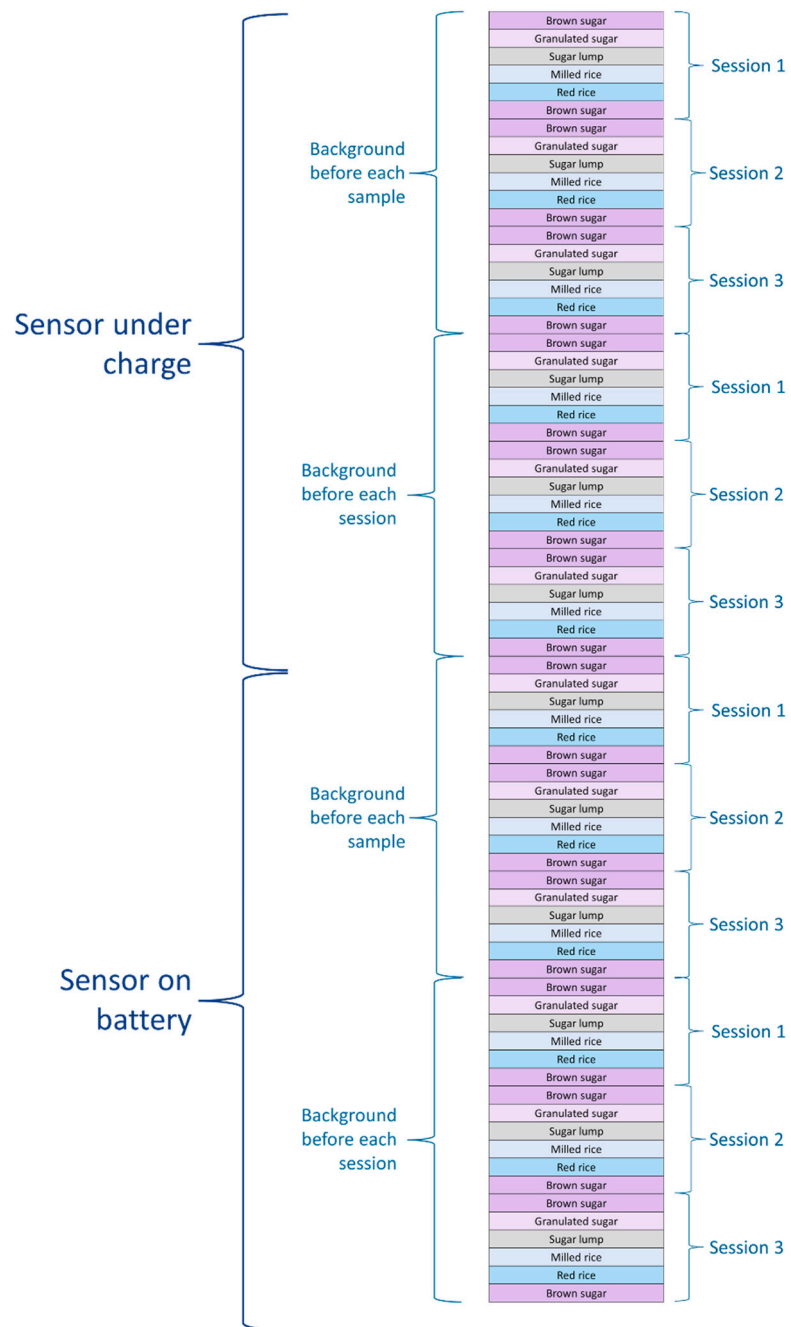

Supplementary Figure S3. Dataset structure scheme for MicroNir OnSite-W

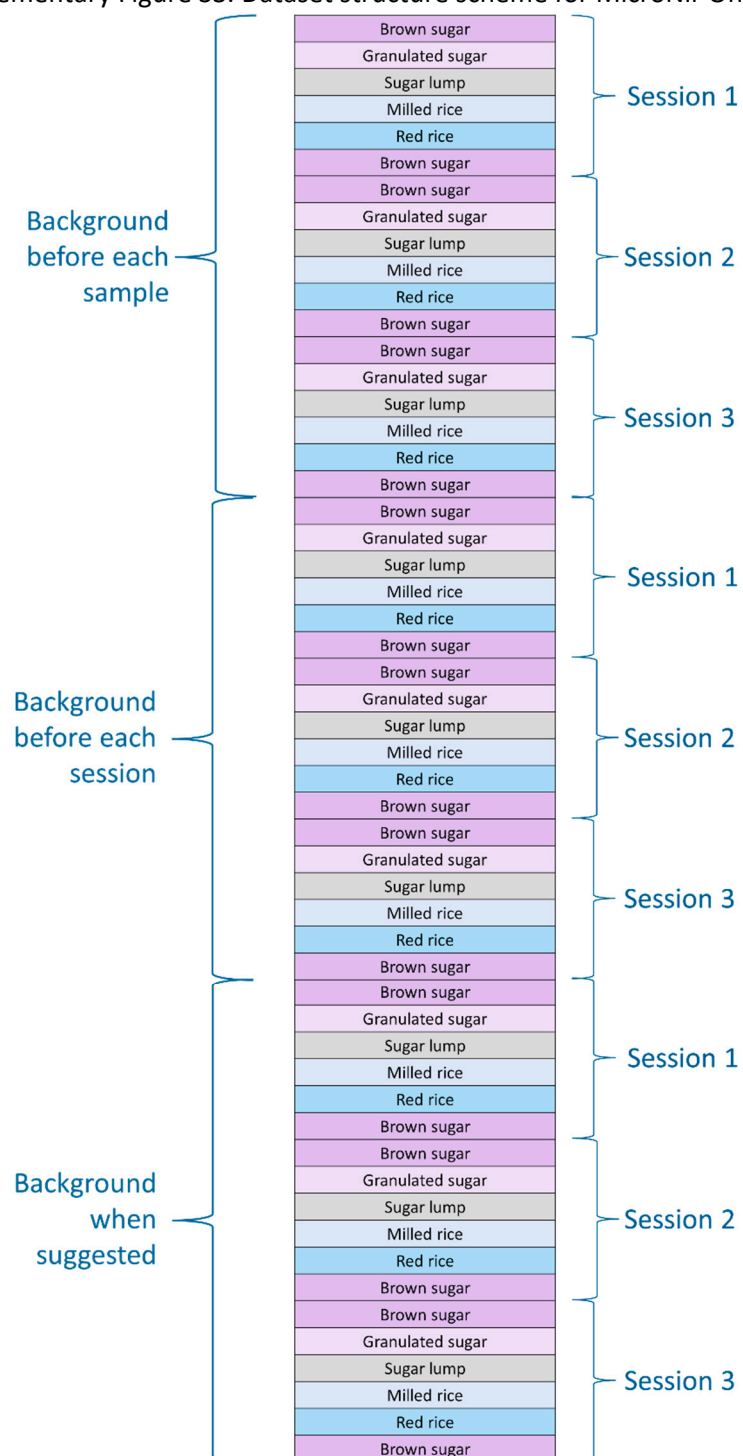

Supplementary Figure S4. Dataset structure scheme for AvaSpec-Mini NIR

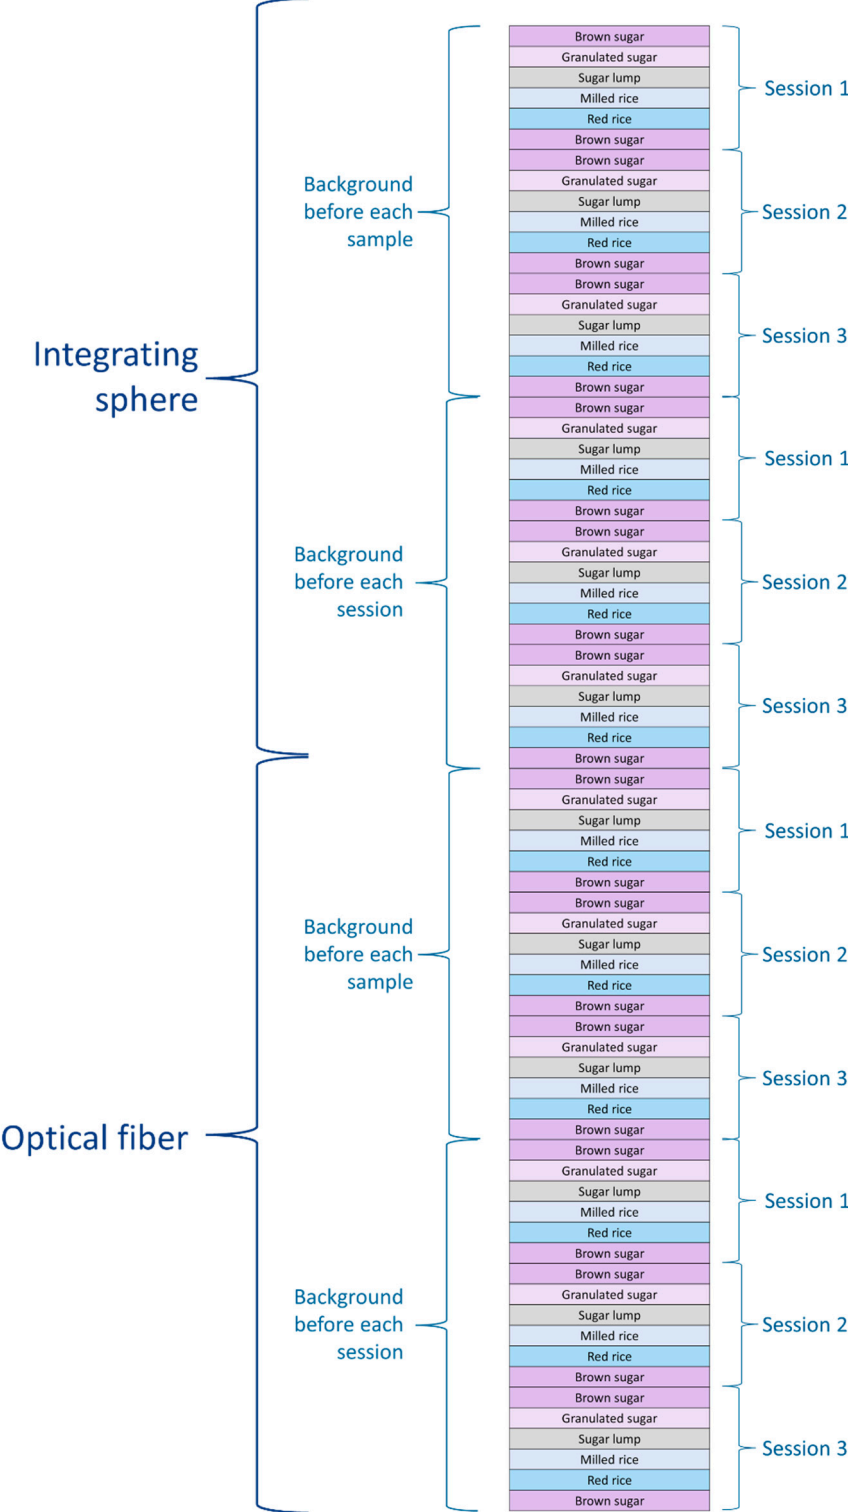

Supplementary Figure S5. Dataset structure scheme for NeoSpectra Scanner

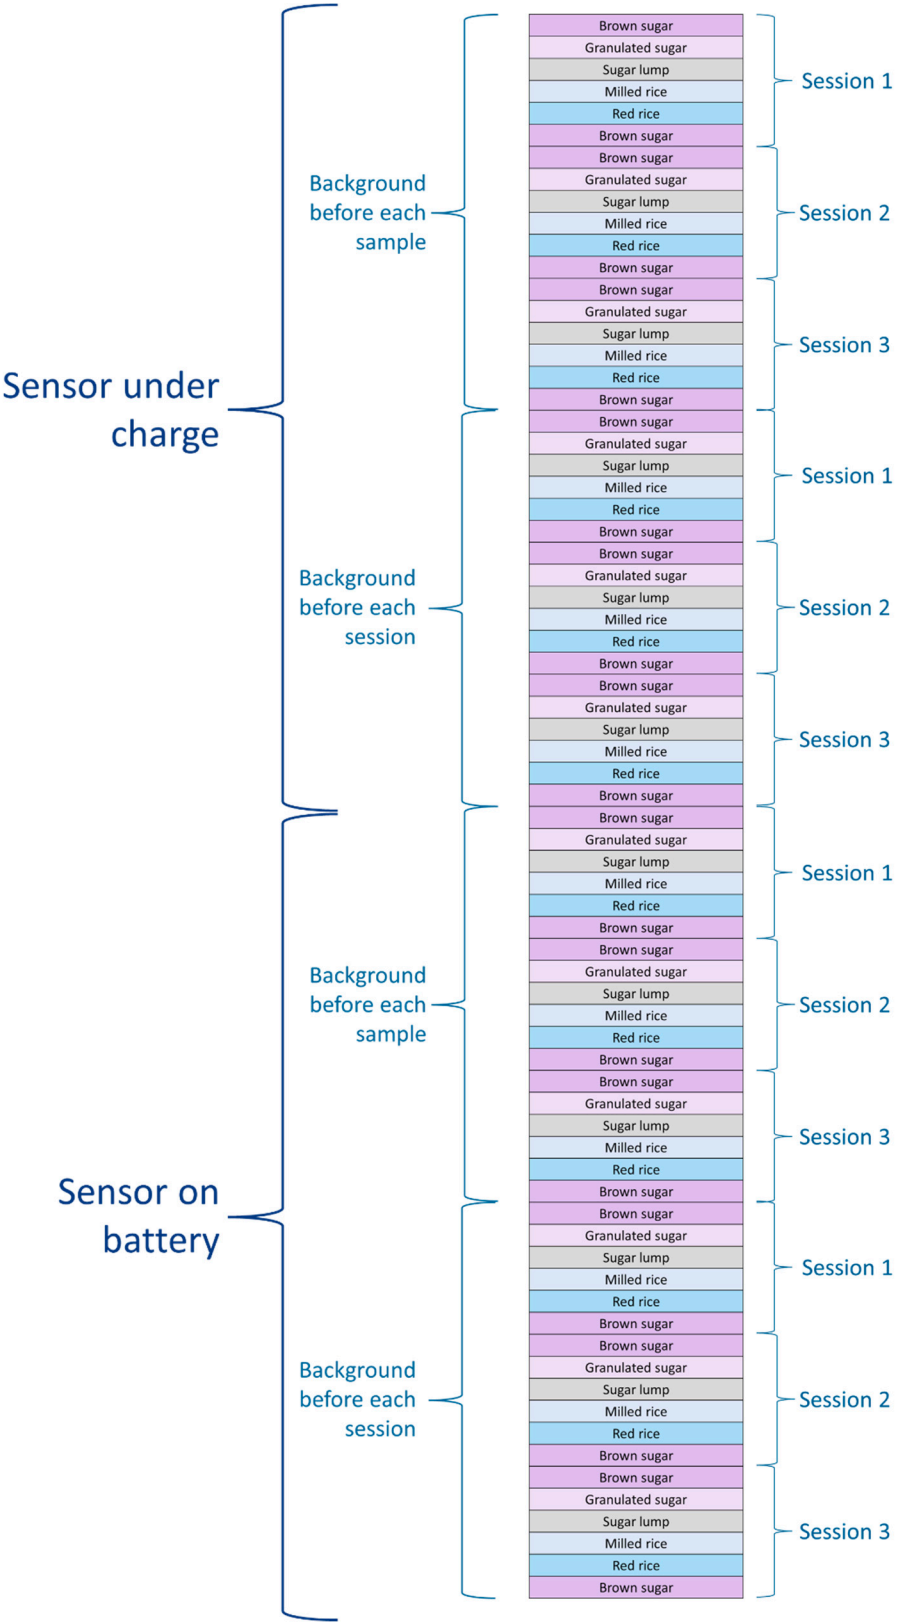

Supplementary Figure S6. Dataset structure scheme for NeoSpectra development kit

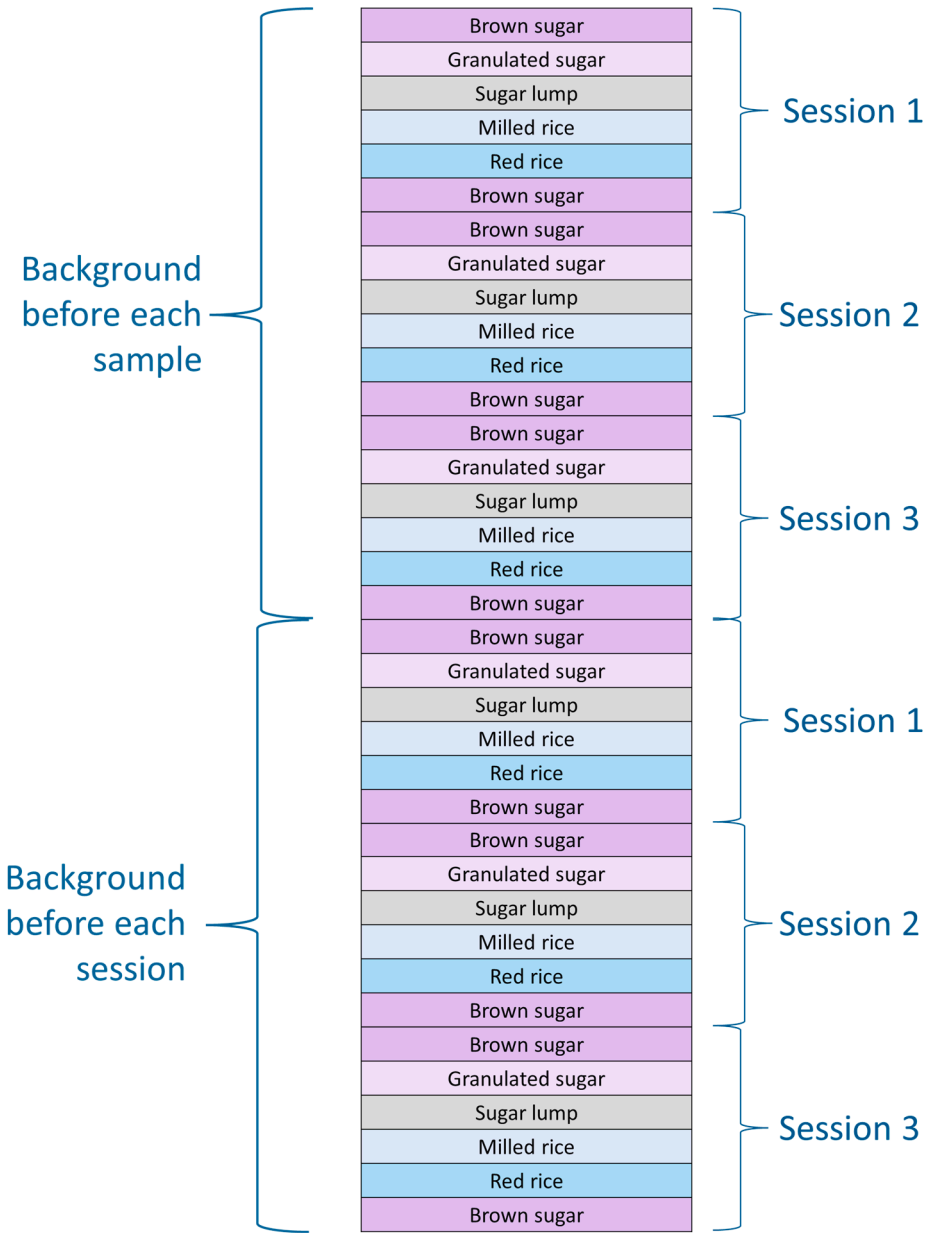

Supplementary Figure S7. Averaged spectra of each sample with the different spectrometers: (a) SCiO, (b) Viavi Micro-NIR, (c) AvaSpec with integrating sphere, (d) AvaSpec with optical fiber, (e) NeoSpectra Scanner, (f) NeoSpectra Development kit

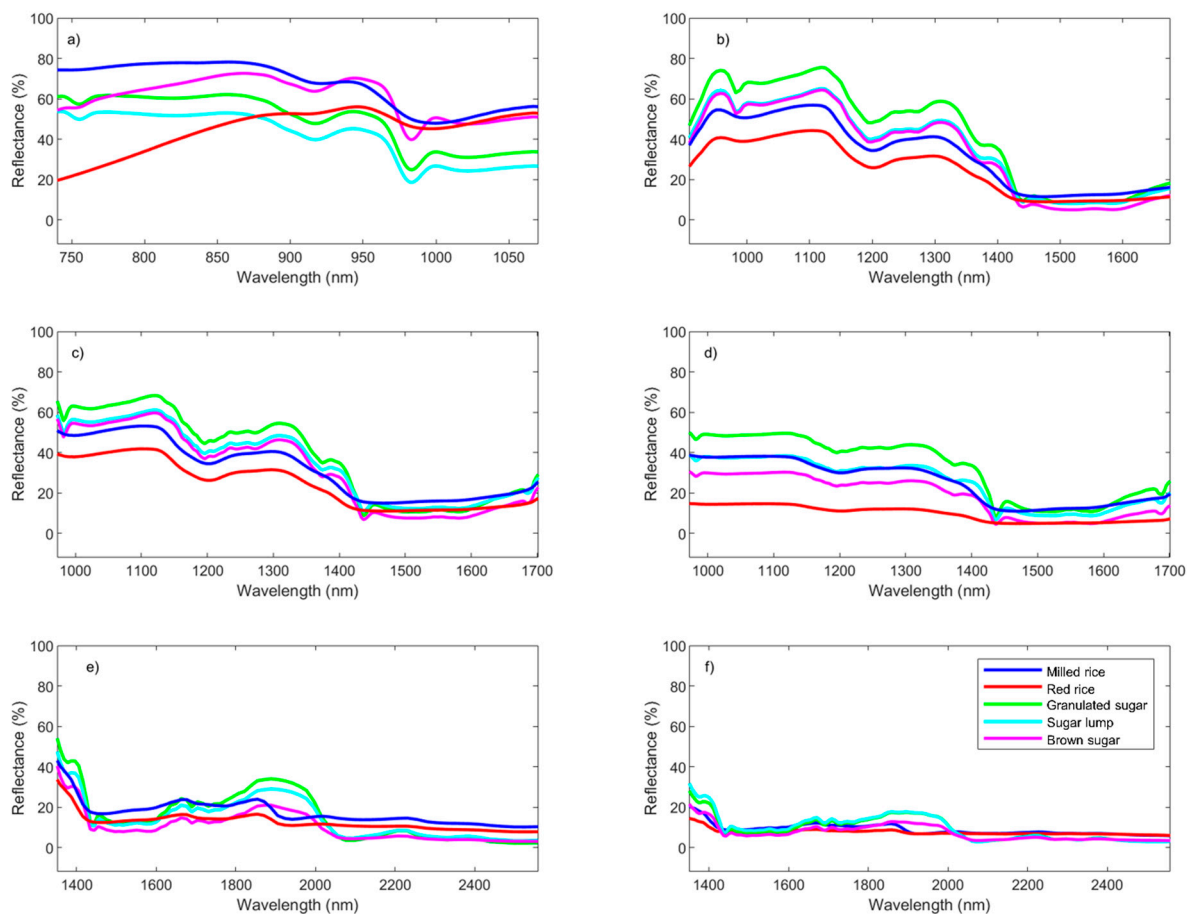

Supplementary Figure S8. PCA results on data preprocessed with MSC: Score plot for (a) SCiO, (b) Viavi Micro-NIR, (c) AvaSpec with integrating sphere, (d) AvaSpec with optical fibre, (e) NeoSpectra Scanner, (f) NeoSpectra Development kit.

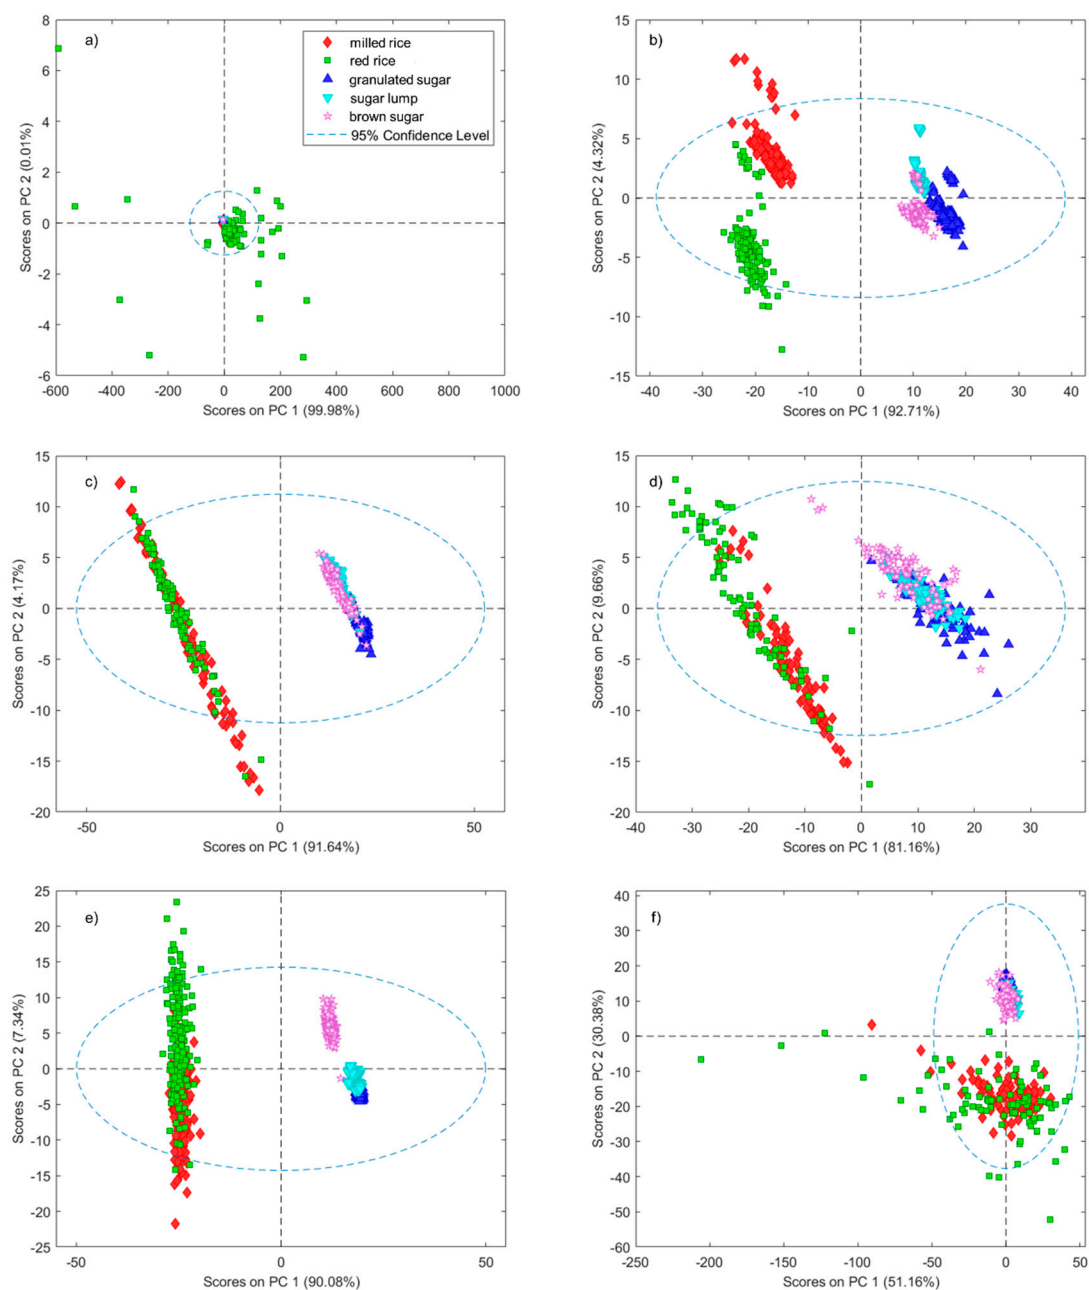

Supplementary Figure S9. PCA results on data preprocessed with MSC: Loading plot for (a) SClO, (b) Viavi Micro-NIR, (c) AvaSpec with integrating sphere, (d) AvaSpec with optical fiber, (e) NeoSpectra Scanner, (f) NeoSpectra Development kit.



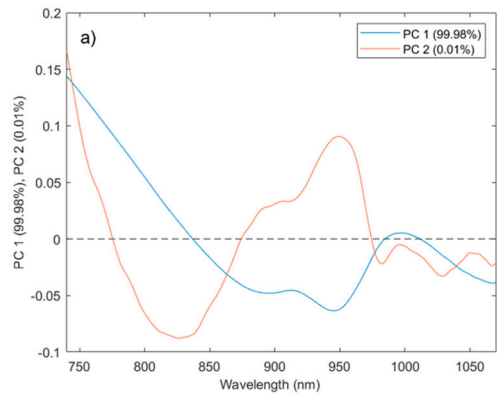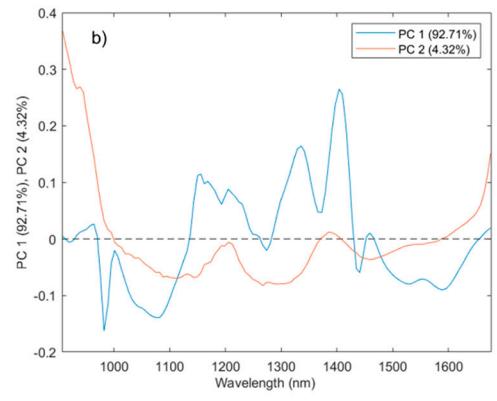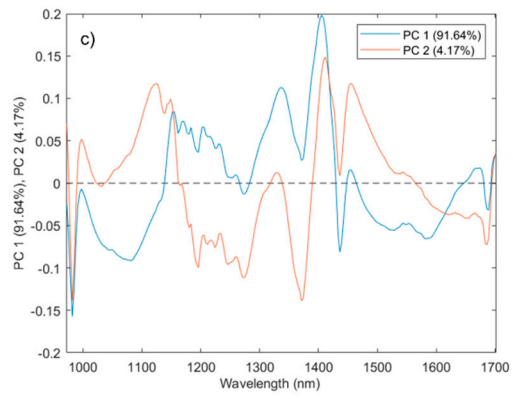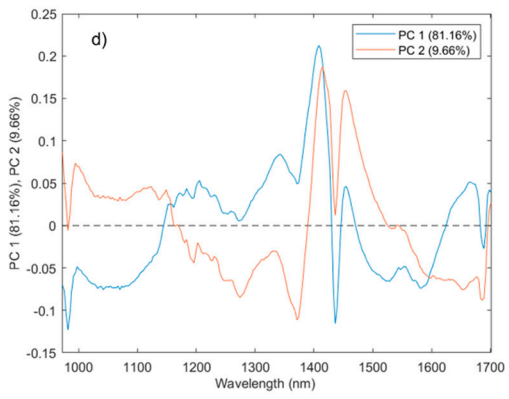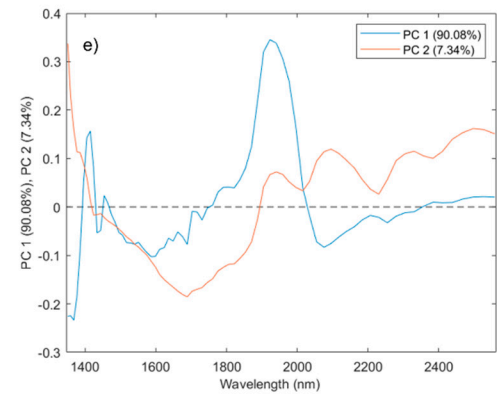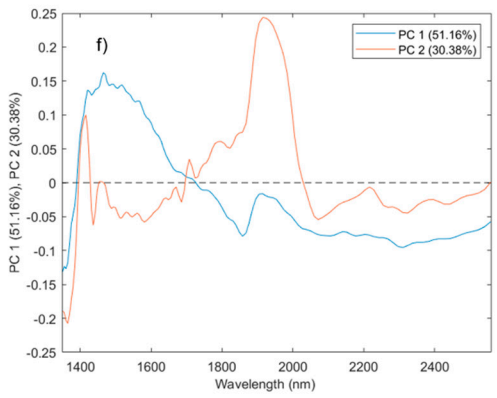

Supplementary Figure S10. PCA results on data preprocessed with SNV: Score plot for (a) SCiO, (b) Viavi Micro-NIR, (c) AvaSpec with integrating sphere, (d) AvaSpec with optical fibre, (e) NeoSpectra Scanner, (f) NeoSpectra Development kit.

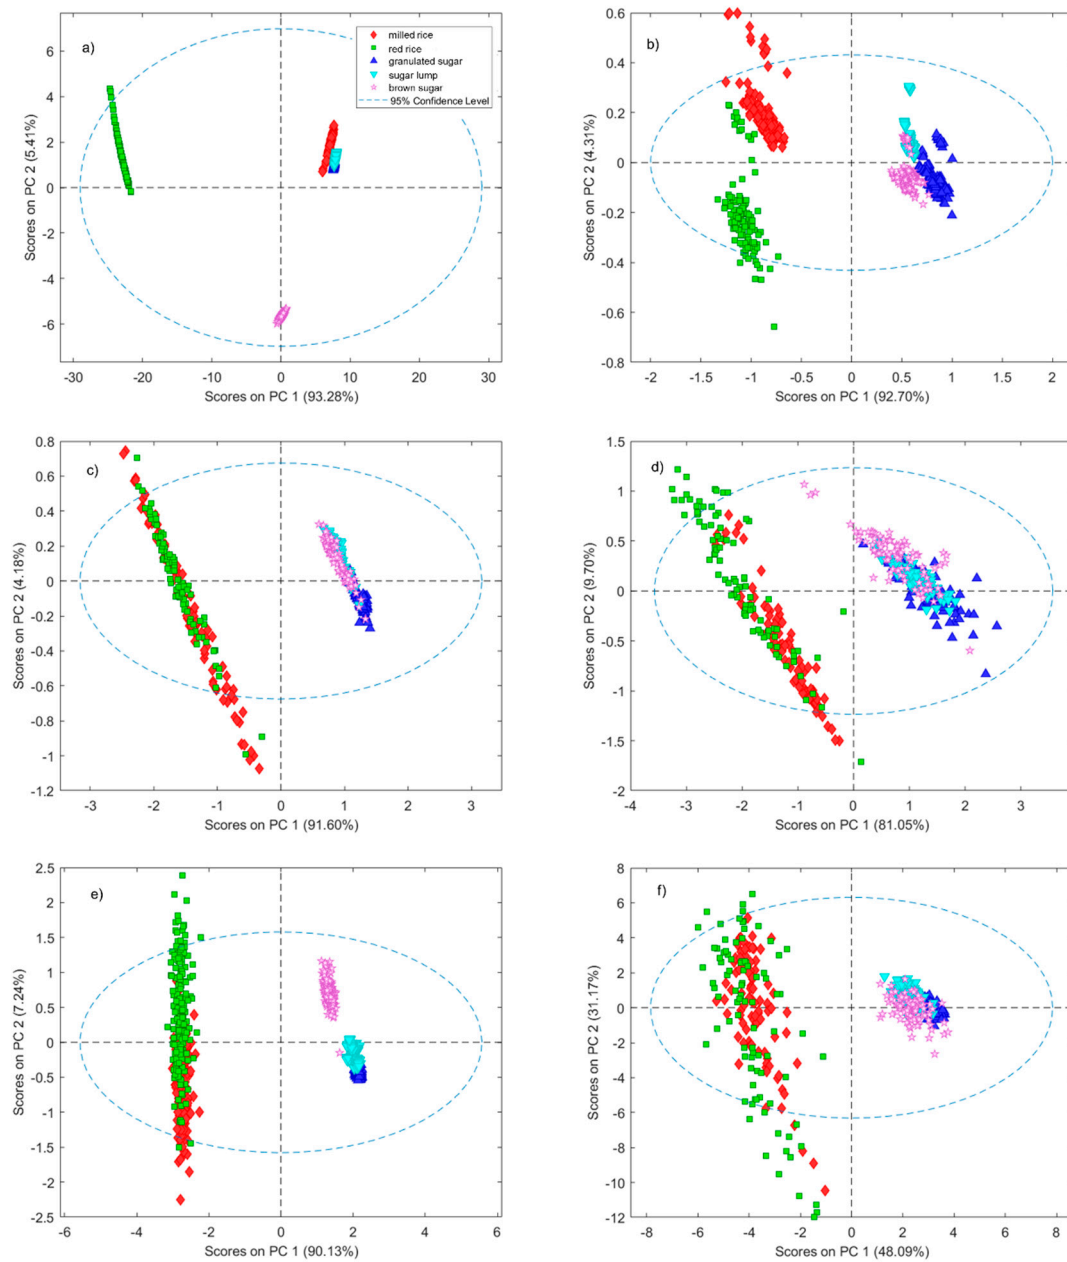

Supplementary Figure S11. PCA results on data preprocessed with SNV: Loading plot for (a) SCiO, (b) Viavi Micro-NIR, (c) AvaSpec with integrating sphere, (d) AvaSpec with optical fiber, (e) NeoSpectra Scanner, (f) NeoSpectra Development kit.

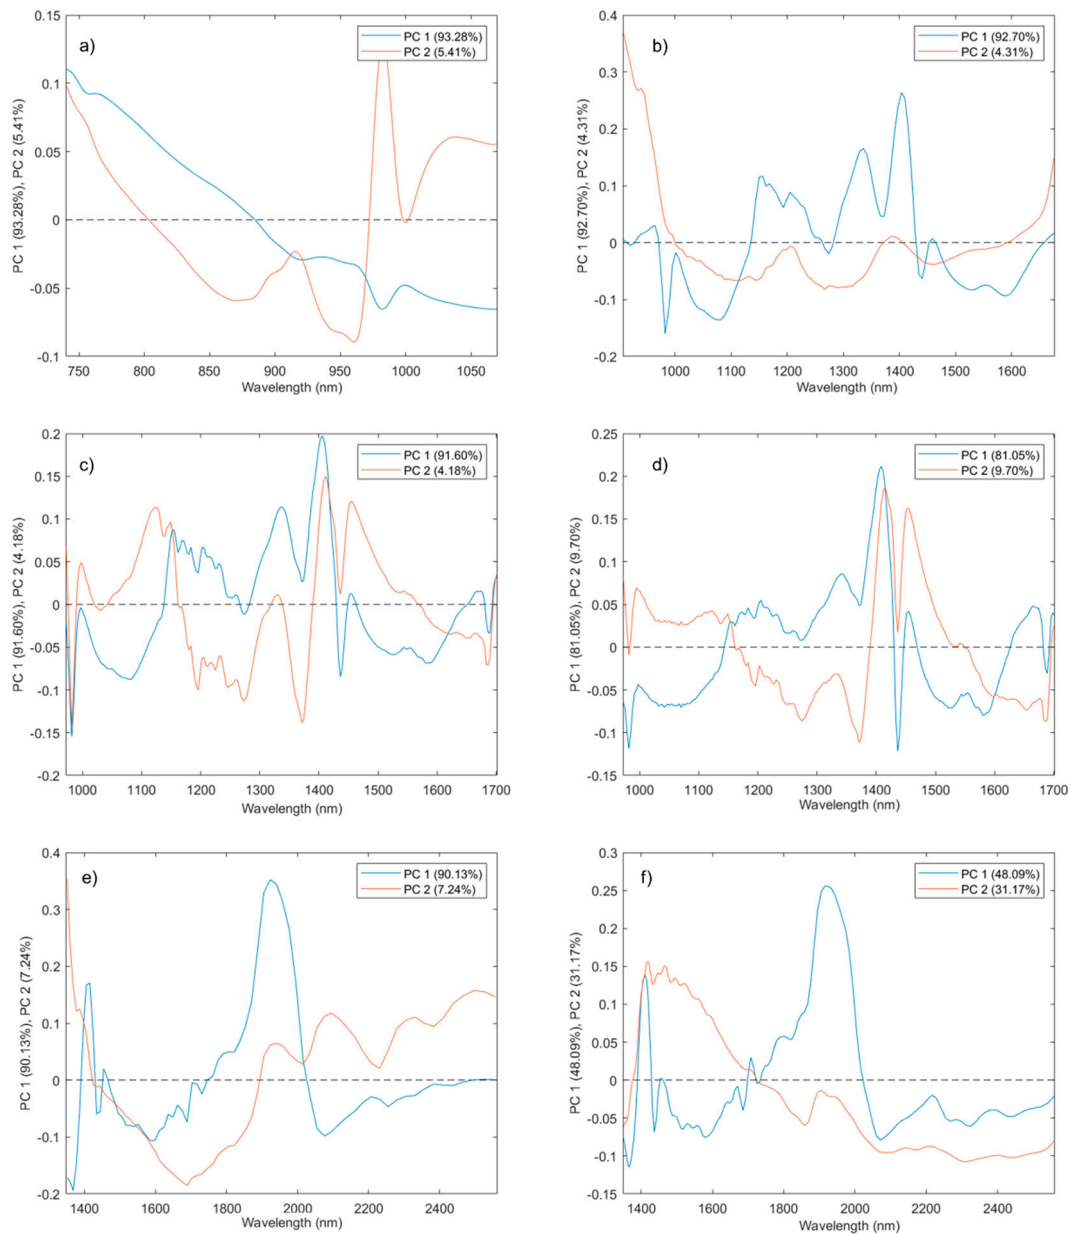

*Supplementary Table S1. Resume of results for ASCA models of SCiO data. Effect in percentage which represent the contribution to the sum of squares of the data and cumulative eigenvalue. Models calculated on each type of sample according to the macro-chemical characteristics. In bold are reported factors that shown a  $p$ -value < 0.05 after 200 permutations. The factor “sample” included as sample levels respectively milled rice, brown rice, granulated sugar, sugar lump and only the replicate of the brown sugar acquired at the beginning of each session.*

| <b><i>Factors</i></b>        | <b>Effects</b>       |                     |                      |
|------------------------------|----------------------|---------------------|----------------------|
|                              | <b>Samples (all)</b> | <b>Rice samples</b> | <b>Sugar samples</b> |
| Sample                       | <b>74.95</b>         | <b>71.22</b>        | <b>72.43</b>         |
| Order of replicates          | 0.49                 | 1.28                | <b>1.84</b>          |
| Session                      | 0.12                 | 0.22                | 0.10                 |
| Power supply                 | 0.00                 | 0.01                | 0.01                 |
| Timing of background         | <b>0.30</b>          | <b>0.35</b>         | <b>0.39</b>          |
| Sample x Order of replicates | <b>2.53</b>          | 1.45                | <b>2.87</b>          |
| Sample x Session             | 0.16                 | 0.14                | 0.16                 |
| Sample x Power supply        | 0.13                 | 0.18                | 0.06                 |

|                                            |             |             |             |
|--------------------------------------------|-------------|-------------|-------------|
| Sample x Timing of background              | <b>0.37</b> | <b>0.57</b> | 0.09        |
| Order of replicates x Session              | 0.51        | 2.07        | 0.62        |
| Order of replicates x Power supply         | <b>0.85</b> | 1.54        | <b>1.54</b> |
| Order of replicates x Timing of background | 0.19        | 0.56        | 0.44        |
| Session x Power supply                     | 0.10        | 0.25        | 0.04        |
| Session x Timing of background             | 0.05        | 0.23        | 0.01        |
| Power supply x Timing of background        | 0.04        | 0.11        | 0.01        |
| Residuals                                  | 19.20       | 19.83       | 19.39       |

*Supplementary Table S2. Resume of results for ASCA models of MicroNIR data. Effect in percentage which represent the contribution to the sum of squares of the data and cumulative eigenvalue. Models calculated on each type of sample according to the macro-chemical characteristics. In bold are reported factors that shown a  $p$ -value  $< 0.05$  after 200 permutations. The factor “sample” included as sample levels respectively milled rice, brown rice, granulated sugar, sugar lump and only the replicate of the brown sugar acquired at the beginning of each session.*

| <u>Factors</u>                             | Effects       |              |               |
|--------------------------------------------|---------------|--------------|---------------|
|                                            | Samples (all) | Rice samples | Sugar samples |
| Sample                                     | <b>90.89</b>  | <b>76.65</b> | <b>81.02</b>  |
| Order of replicates                        | 0.14          | <b>1.74</b>  | 0.35          |
| Session                                    | <b>0.65</b>   | <b>1.33</b>  | <b>2.04</b>   |
| Timing of background                       | <b>0.70</b>   | <b>1.03</b>  | <b>2.11</b>   |
| Sample x Order of replicates               | <b>0.73</b>   | <b>1.73</b>  | 0.38          |
| Sample x Session                           | <b>0.25</b>   | <b>0.63</b>  | <b>1.37</b>   |
| Sample x Timing of background              | <b>1.98</b>   | <b>0.38</b>  | <b>7.30</b>   |
| Order of replicates x Session              | 0.10          | 1.45         | 0.04          |
| Order of replicates x Timing of background | 0.12          | 1.96         | 0.04          |
| Session x Timing of background             | <b>0.39</b>   | <b>2.11</b>  | <b>1.18</b>   |
| Residuals                                  | 4.05          | 10.98        | 4.16          |

*Supplementary Table S3. Resume of results for ASCA models of AvaSpec-mini-NIR data. Effect in percentage which represent the contribution to the sum of squares of the data and cumulative eigenvalue. Models calculated on each type of sample according to the macro-chemical characteristics. In bold are reported factors that shown a  $p$ -value  $< 0.05$  after 200 permutations. The factor “sample” included as sample levels respectively milled rice, brown rice, granulated sugar, sugar lump and only the replicate of the brown sugar acquired at the beginning of each session.*

| <u>Factors</u>                | Effects       |              |               |                    |              |               |
|-------------------------------|---------------|--------------|---------------|--------------------|--------------|---------------|
|                               | Optical fiber |              |               | Integrating sphere |              |               |
|                               | Samples (all) | Rice samples | Sugar samples | Samples (all)      | Rice samples | Sugar samples |
| Sample                        | <b>33.83</b>  | <b>43.30</b> | <b>18.25</b>  | <b>64.46</b>       | <b>28.49</b> | <b>60.48</b>  |
| Number of replicates          | 2.21          | 3.84         | 3.48          | 1.08               | 5.83         | 0.97          |
| Session                       | 0.55          | 1.58         | 0.73          | 0.21               | 0.14         | <b>1.22</b>   |
| Timing of background          | <b>0.86</b>   | <b>2.24</b>  | 0.55          | 0.24               | 0.43         | <b>0.68</b>   |
| Sample x Number of replicates | 8.82          | 4.21         | 10.48         | 3.44               | 4.09         | 1.92          |
| Sample x Session              | <b>3.21</b>   | 0.88         | <b>3.97</b>   | <b>1.12</b>        | 1.03         | <b>4.25</b>   |
| Sample x Timing of background | <b>1.40</b>   | 0.18         | <b>1.96</b>   | <b>1.26</b>        | 0.70         | <b>5.93</b>   |

|                                             |             |       |       |       |       |             |
|---------------------------------------------|-------------|-------|-------|-------|-------|-------------|
| Number of replicates x Session              | 2.50        | 8.68  | 6.68  | 2.34  | 12.38 | 2.16        |
| Number of replicates x Timing of background | 1.61        | 3.53  | 3.57  | 0.89  | 6.14  | 0.56        |
| Session x Timing of background              | <b>0.77</b> | 0.78  | 0.94  | 0.09  | 0.56  | <b>1.25</b> |
| Residuals                                   | 44.24       | 30.77 | 49.39 | 24.87 | 40.21 | 20.58       |

*Supplementary Table S4. Resume of results for ASCA models of NeoSpectra Scanner data. Effect in percentage which represent the contribution to the sum of squares of the data and cumulative eigenvalue. Models calculated on each type of sample according to the macro-chemical characteristics. In bold are reported factors that shown a p-value < 0.05 after 200 permutations. The factor “sample” included as sample levels respectively milled rice, brown rice, granulated sugar, sugar lump and only the replicate of the brown sugar acquired at the beginning of each session.*

| <u>Factors</u>                             | Effects       |              |               |
|--------------------------------------------|---------------|--------------|---------------|
|                                            | Samples (all) | Rice samples | Sugar samples |
| Sample                                     | <b>90.24</b>  | <b>58.24</b> | <b>94.53</b>  |
| Order of replicates                        | 0.10          | 1.21         | 0.06          |
| Session                                    | <b>0.04</b>   | 0.54         | <b>0.11</b>   |
| Power supply                               | <b>0.04</b>   | 0.02         | <b>0.17</b>   |
| Timing of background                       | 0.01          | 0.04         | <b>0.05</b>   |
| Sample x Order of replicates               | 0.39          | 1.08         | 0.12          |
| Sample x Session                           | <b>0.29</b>   | 0.42         | <b>0.42</b>   |
| Sample x Power supply                      | <b>0.16</b>   | <b>0.54</b>  | <b>0.15</b>   |
| Sample x Timing of background              | <b>0.16</b>   | 0.28         | <b>0.35</b>   |
| Order of replicates x Session              | 0.20          | 2.62         | 0.10          |
| Order of replicates x Power supply         | 0.15          | 2.24         | 0.03          |
| Order of replicates x Timing of background | 0.13          | 1.79         | 0.06          |
| Session x Power supply                     | 0.02          | 0.14         | <b>0.12</b>   |
| Session x Timing of background             | <b>0.05</b>   | 0.04         | <b>0.17</b>   |
| Power supply x Timing of background        | 0.03          | 0.22         | <b>0.11</b>   |
| Residuals                                  | 8.00          | 30.58        | 3.45          |

*Supplementary Table S5. Resume of results for ASCA models of NeoSpectra development kit data. Effect in percentage which represent the contribution to the sum of squares of the data and cumulative eigenvalue. Models calculated on each type of sample according to the macro-chemical characteristics. In bold are reported factors that shown a p-value < 0.05 after 200 permutations. The factor “sample” included as sample levels respectively milled rice, brown rice, granulated sugar, sugar lump and only the replicate of the brown sugar acquired at the beginning of each session.*

| <u>Factors</u>                | Effects       |              |               |
|-------------------------------|---------------|--------------|---------------|
|                               | Samples (all) | Rice samples | Sugar samples |
| Sample                        | <b>51.73</b>  | <b>9.87</b>  | <b>55.00</b>  |
| Order of replicates           | 1.52          | 8.19         | 1.13          |
| Session                       | 0.03          | 0.21         | 0.20          |
| Timing of background          | 0.22          | 0.05         | <b>1.03</b>   |
| Sample x Order of replicates  | <b>7.27</b>   | 9.87         | 4.47          |
| Sample x Session              | <b>2.55</b>   | 2.40         | <b>5.70</b>   |
| Sample x Timing of background | <b>1.54</b>   | 0.73         | <b>4.53</b>   |

|                                            |             |              |             |
|--------------------------------------------|-------------|--------------|-------------|
| Order of replicates x Session              | 2.62        | 10.19        | 3.74        |
| Order of replicates x Timing of background | <b>2.53</b> | <b>11.79</b> | 2.53        |
| Session x Time of background               | 0.44        | 1.16         | <b>0.77</b> |
| Residuals                                  | 29.56       | 45.54        | 20.89       |
